# Supplementary material for: FasL-PDPK1 Pathway Promotes the Cytotoxicity of CD8+ T Cells During Ischemic Stroke
Source: Springer Nature journal article supplement (doi:10.1007/s12975-019-00749-0), 2020-02-08
Supplement: MOESM1 [file 17662522]

Supplementary information

**FasL-PDPK1 pathway promotes the cytotoxicity of CD8+ T cells during ischemic stroke**

Fan L, et al.


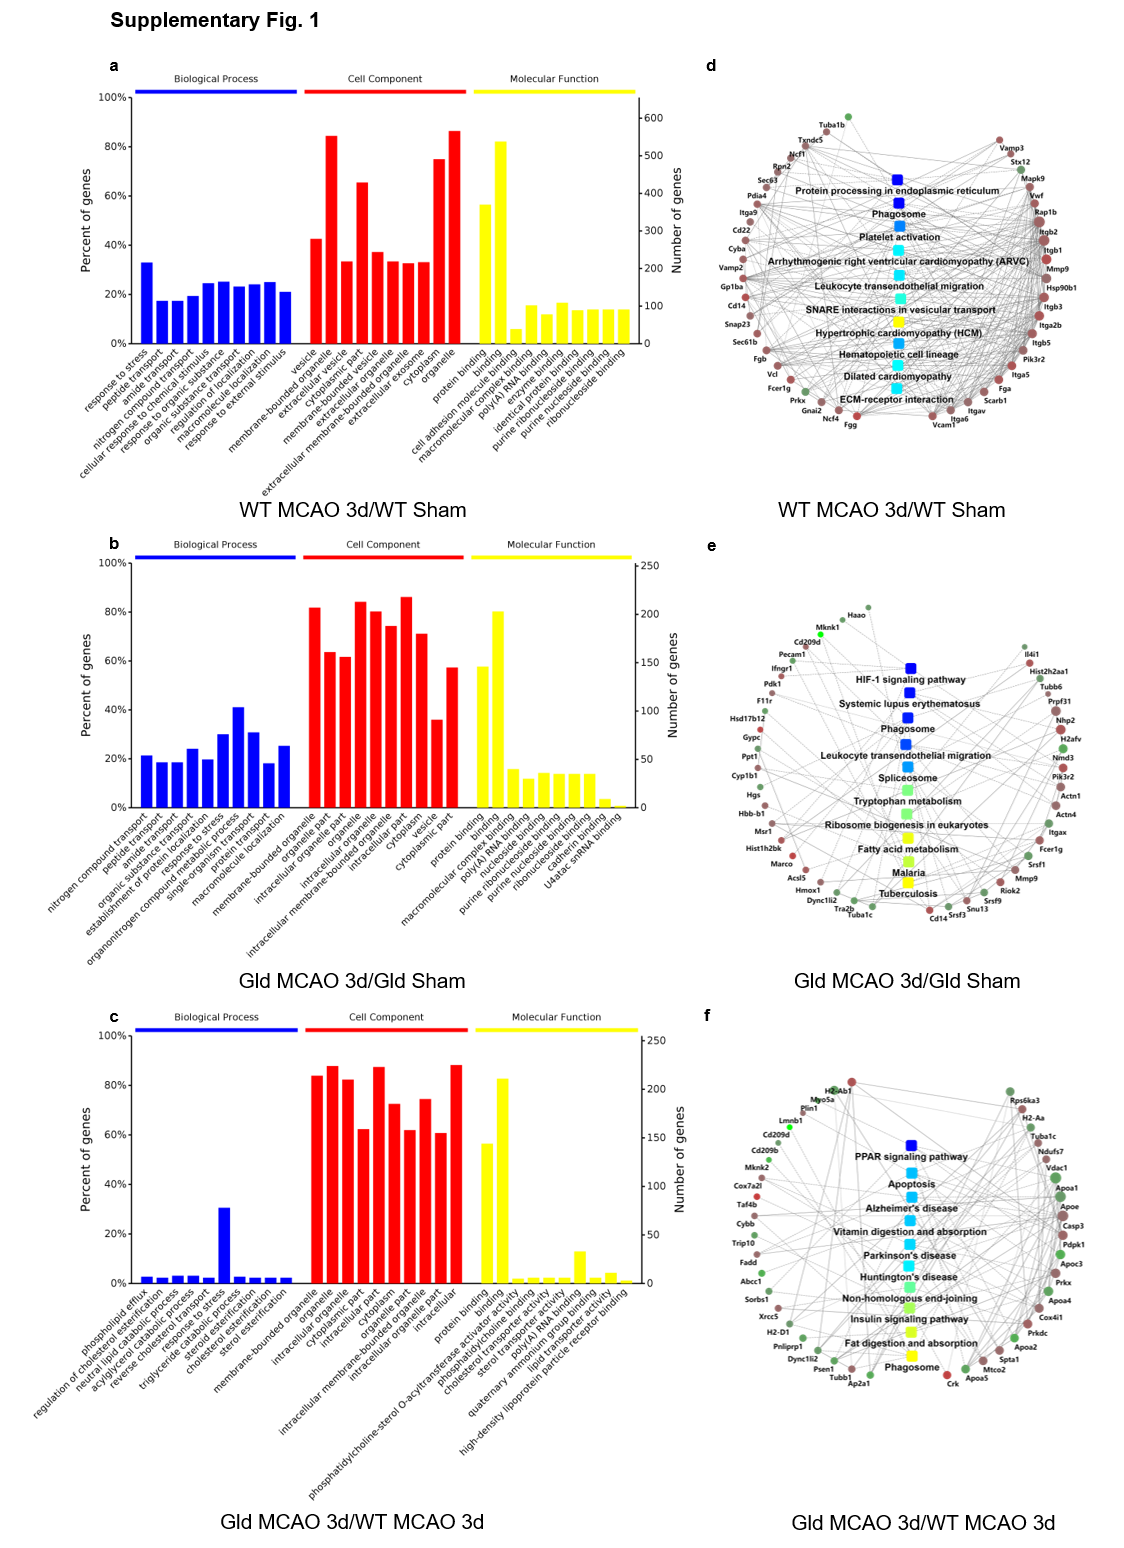


**Supplementary Fig. 1 Proteomic analysis identified PDPK1 as the downstream protein of FasL in CD8+ T cell. a-c** The schematic diagram of GO enrichment analysis showing the top ten significant pathway of Biological Process, Cellular Component and Molecular Function respectively in WT MCAO 3d/WT Sham, Gld MCAO 3d/Gld Sham and Gld MCAO 3d/ WT MCAO 3d. **d-f** The PPI network maps showing the top ten significant signaling pathways regarding to differential proteins in the WT MCAO 3d/WT Sham, Gld MCAO 3d/Gld Sham and Gld MCAO 3d/ WT MCAO 3d respectively.


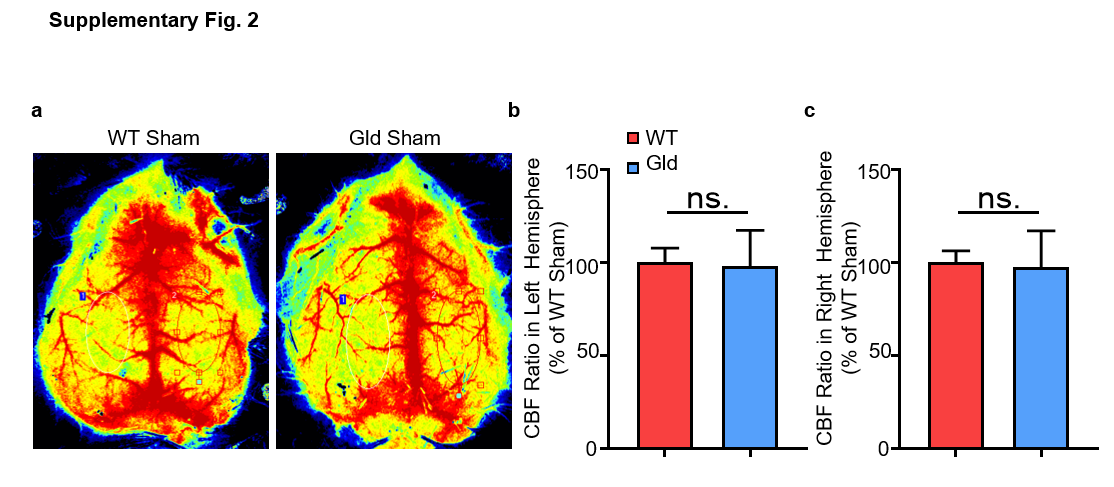


**Supplementary Fig. 2 CBF measurement of WT and Gld mice before MCAO. a** Representative laser speckle perfusion images of WT and Gld mice and ROI selected on both cerebral hemispheres. **b** CBF ratio of WT and Gld mice in the left hemisphere. **c** CBF ratio of WT and Gld mice in the right hemisphere.
